# Supplementary material
Source: PubMed Central journal article supplement (PMC6365016)

**Figure 4**

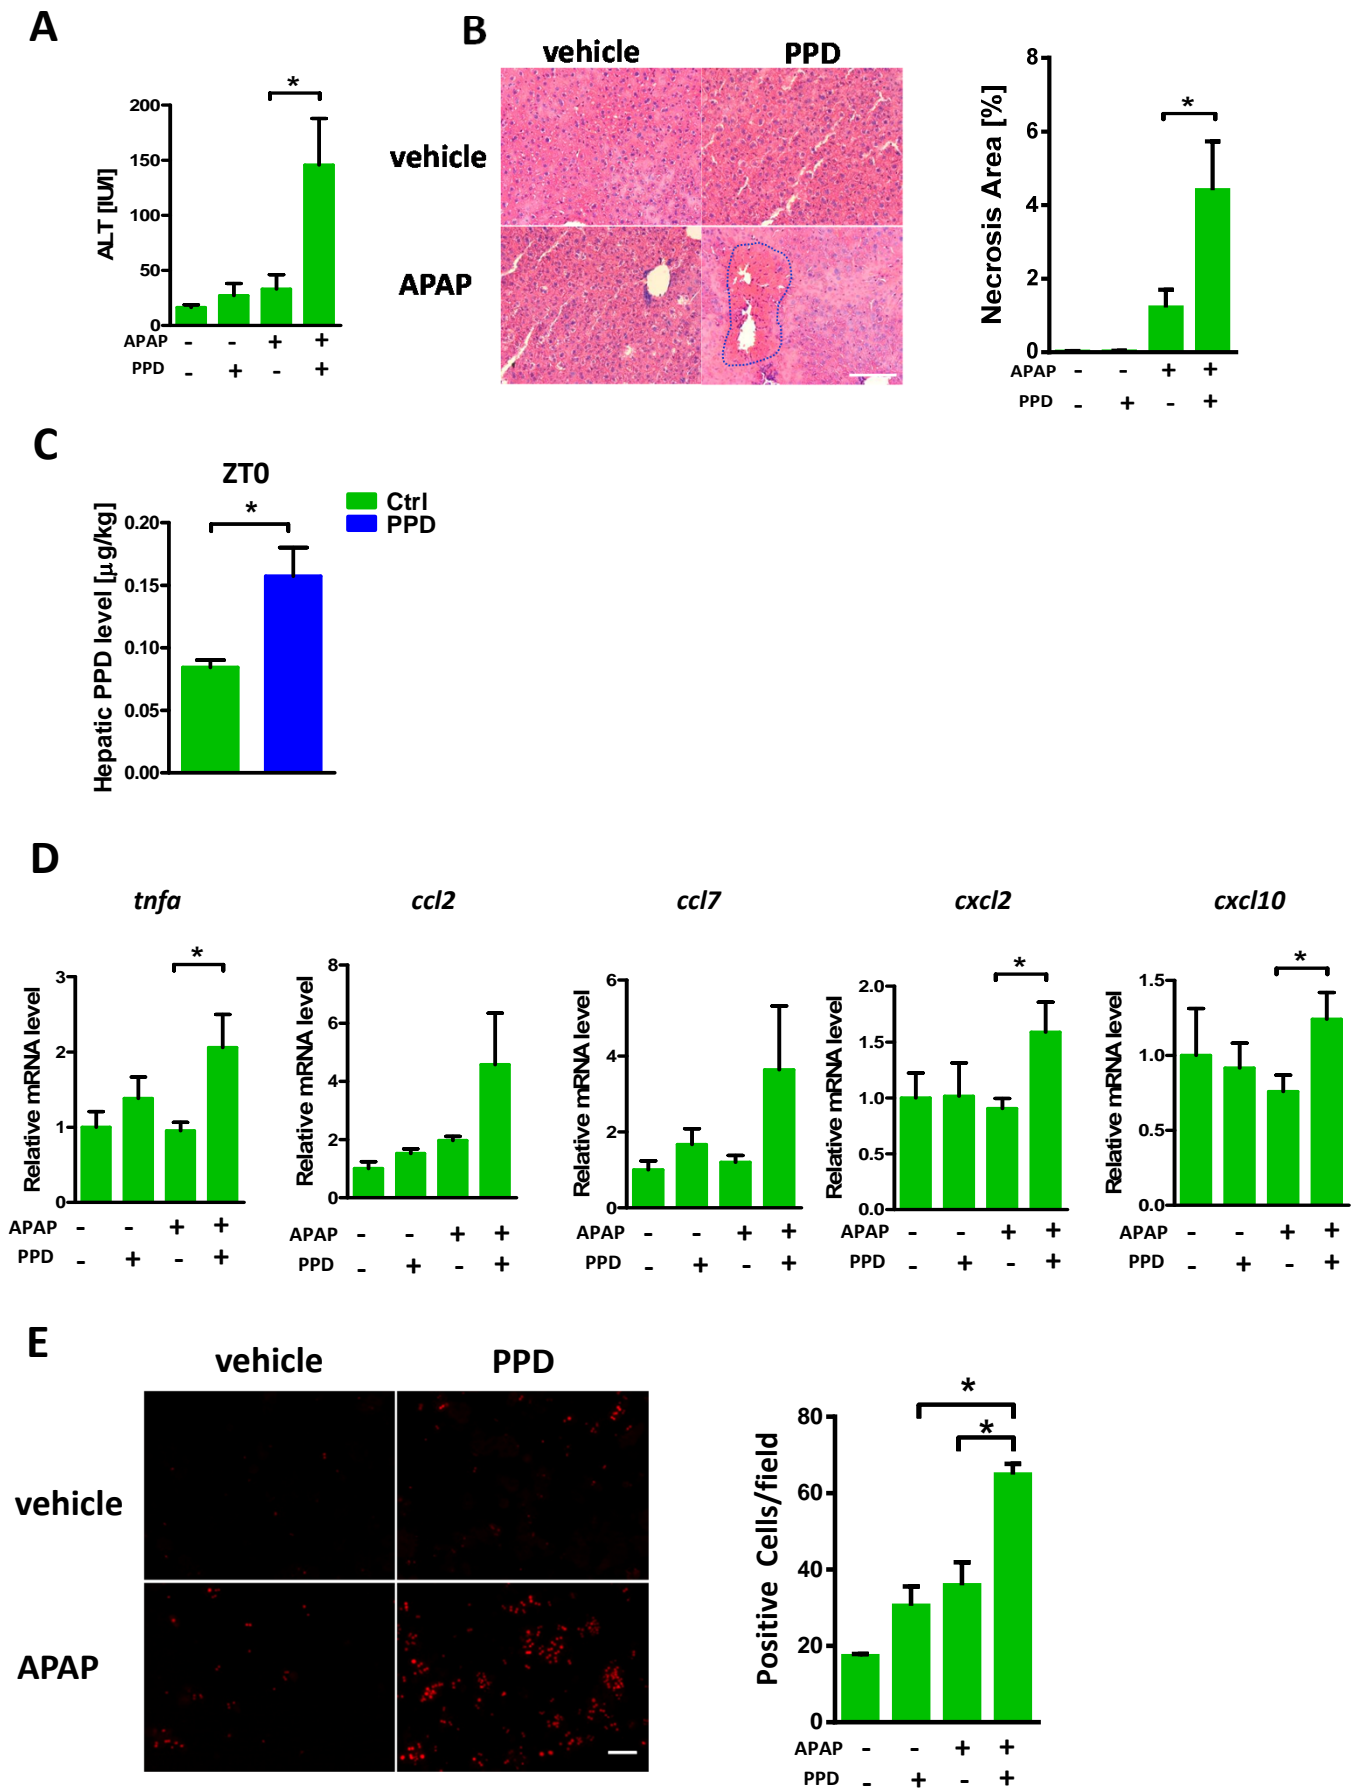

Supplement: NIHMS1518470-supplement-4.pdf [file NIHMS1518470-supplement-4.pdf]

**Figure 6**

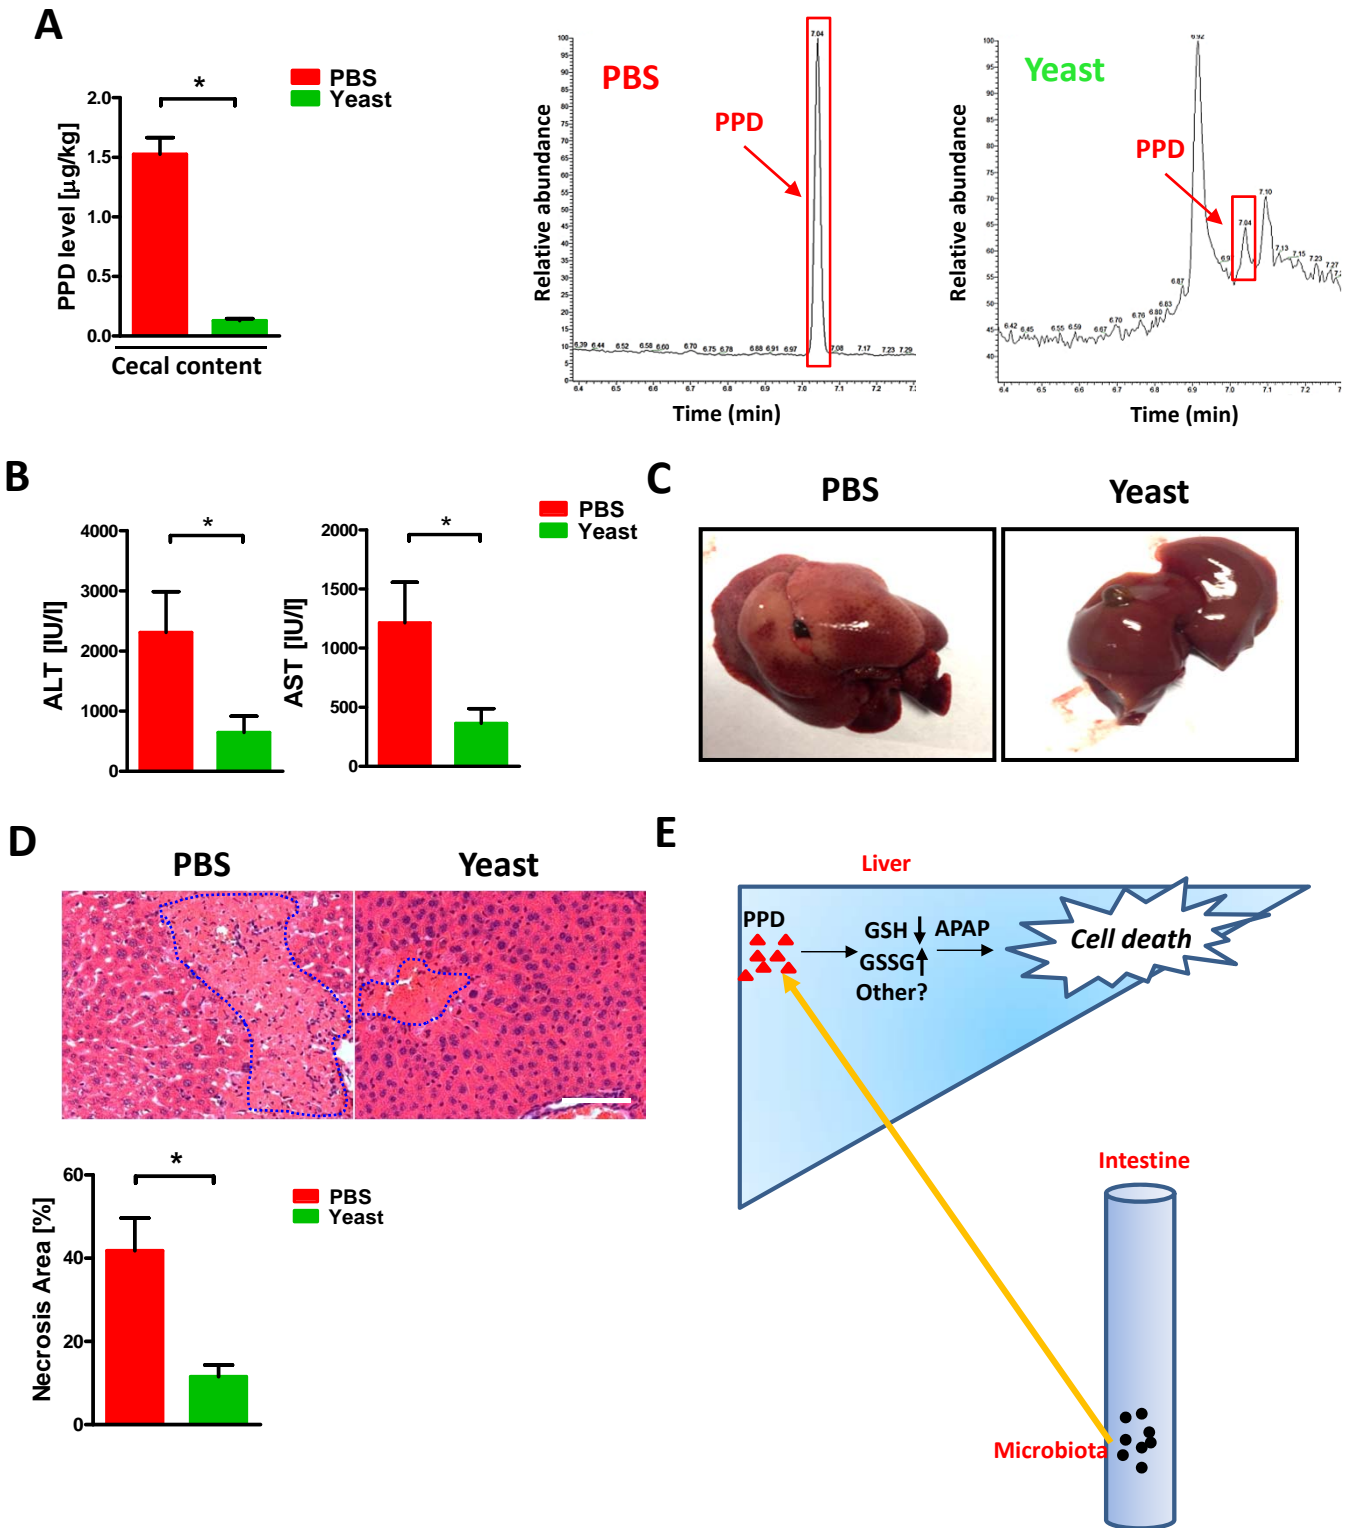

Supplement: NIHMS1518470-supplement-6.pdf [file NIHMS1518470-supplement-6.pdf]
